# Supplementary material for: Photodynamic Inactivation of Pseudomonas aeruginosa by PHEMA Films Loaded with Rose Bengal: Potentiation Effect of Potassium Iodide
Source: MDPI journal article supplement (doi:10.3390/polym13142227), 2021-07-06
Supplement: s1 [file s1]

## *Electronic Supporting Information*

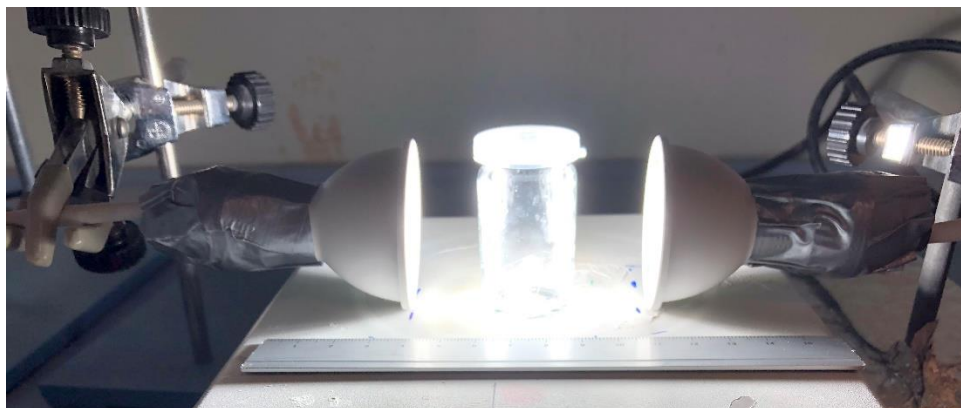

**Figure S1.** Experimental setup for the irradiations of polymers in the presence of singlet oxygen trap DMA.

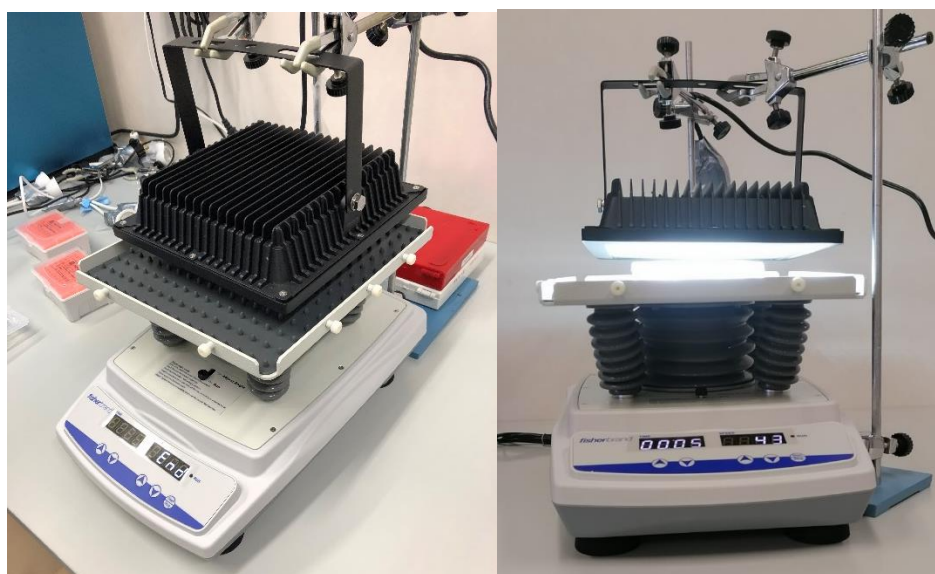

**Figure S2.** Experimental setup for the irradiations of polymers in the presence of bacteria.
